# Supplementary material
Source: PubMed Central journal article supplement (PMC1413820)

A.

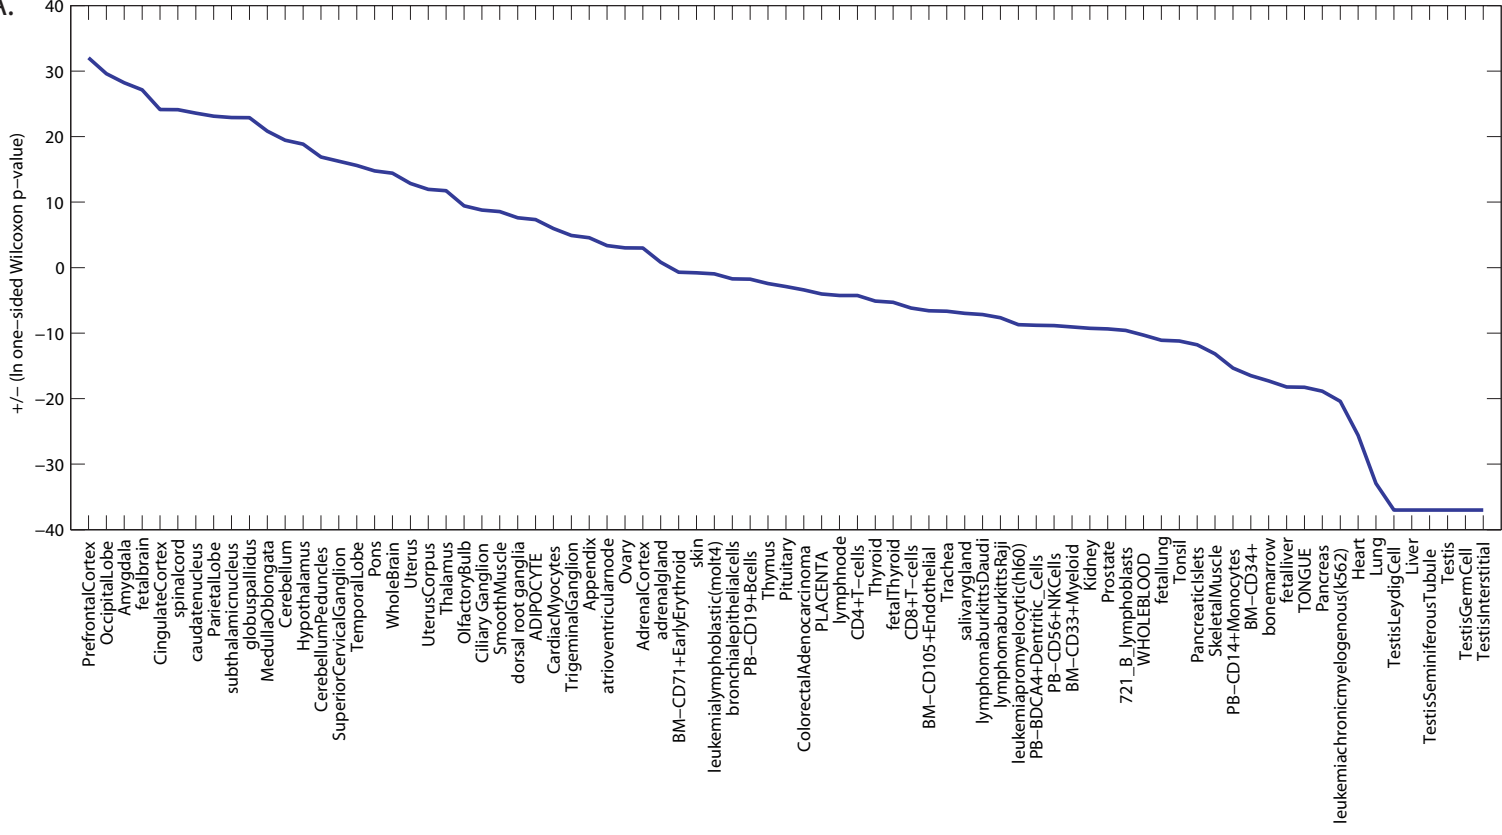

B.

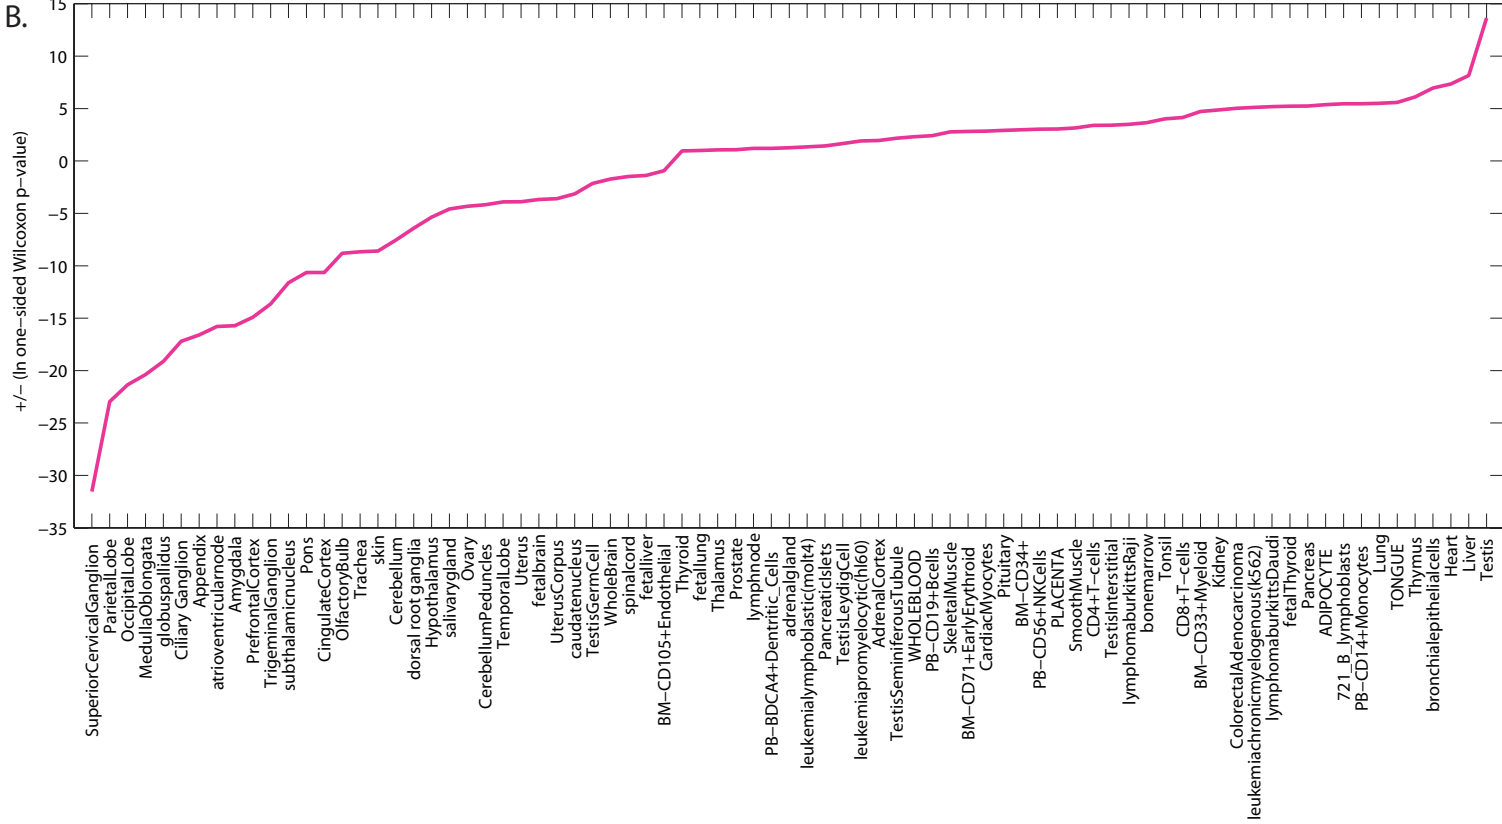

Supplement: pnas_0511045103_3.pdf [file pnas_0511045103_3.pdf]
